# Supplementary material for: Synthesis of C2-Alkoxy-Substituted 19-Nor Vitamin D3 Derivatives: Stereoselectivity and Biological Activity
Source: MDPI journal article supplement (doi:10.3390/biom12010069), 2022-01-04

## **Supplementary material**

### **Synthesis of C2-alkoxy-substituted 19-nor vitamin D<sub>3</sub> derivatives: Stereoselectivity and biological activity**

#### **Table of contents**

|                                                                                                  |        |
|--------------------------------------------------------------------------------------------------|--------|
| <sup>1</sup> H and <sup>13</sup> C NMR spectra of compounds <b>3</b> , <b>5a-c</b> , <b>7a-c</b> | S2-S10 |
| Figure S1: Relative VDR binding affinity of 19-norvitamin D <sub>3</sub>                         | S11    |
| Figure S2: Charts of HL-60 cell differentiation activity of 19-norvitamin D <sub>3</sub>         | S12    |

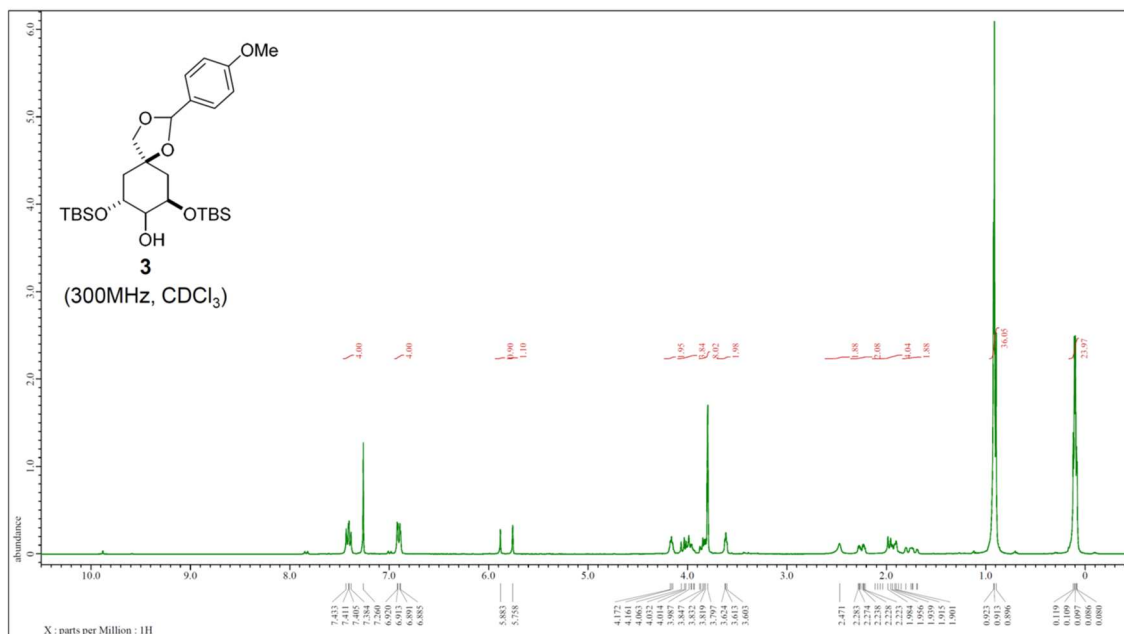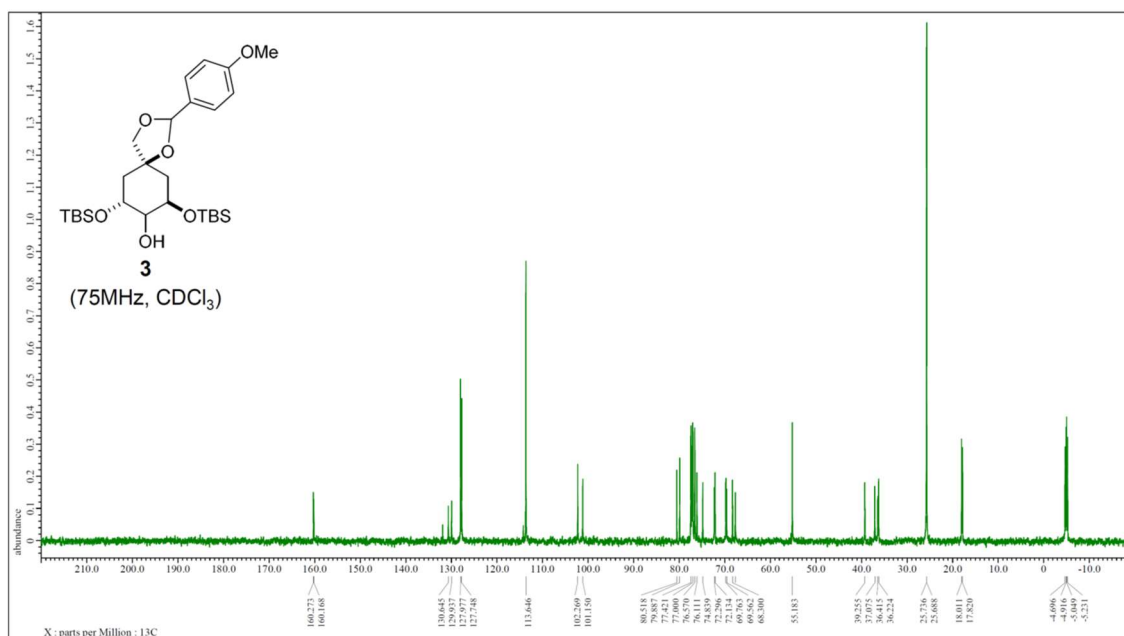

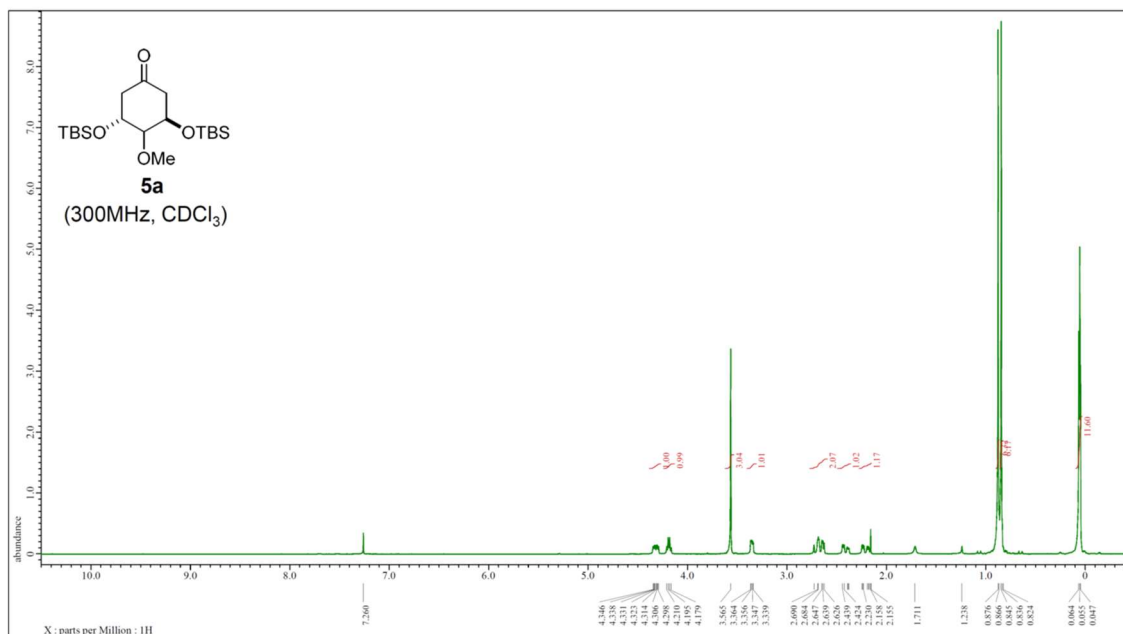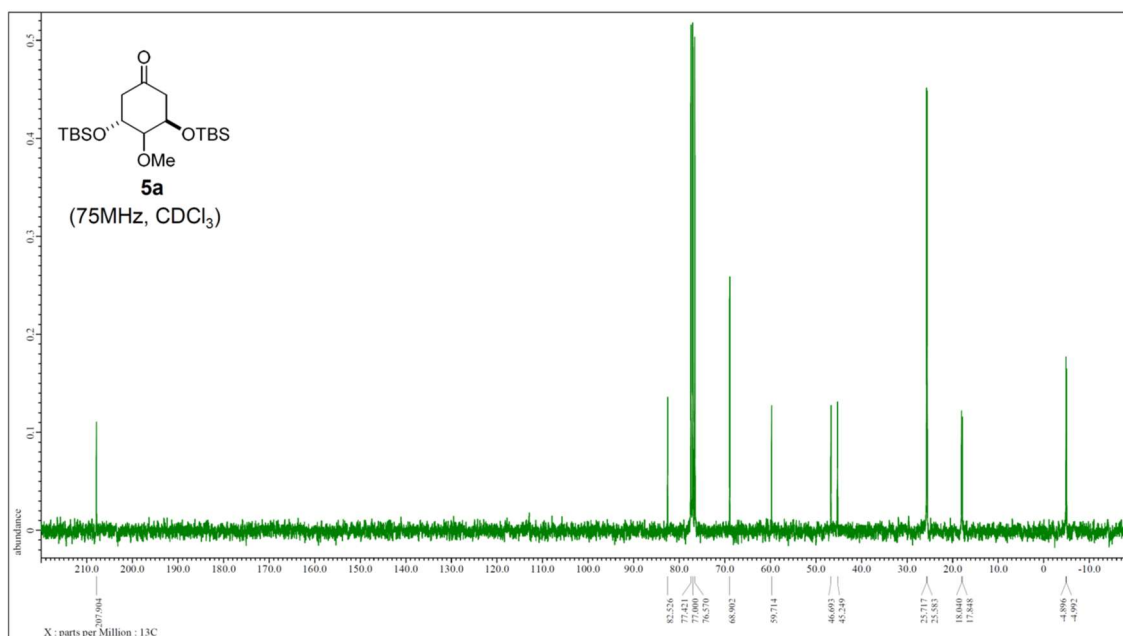



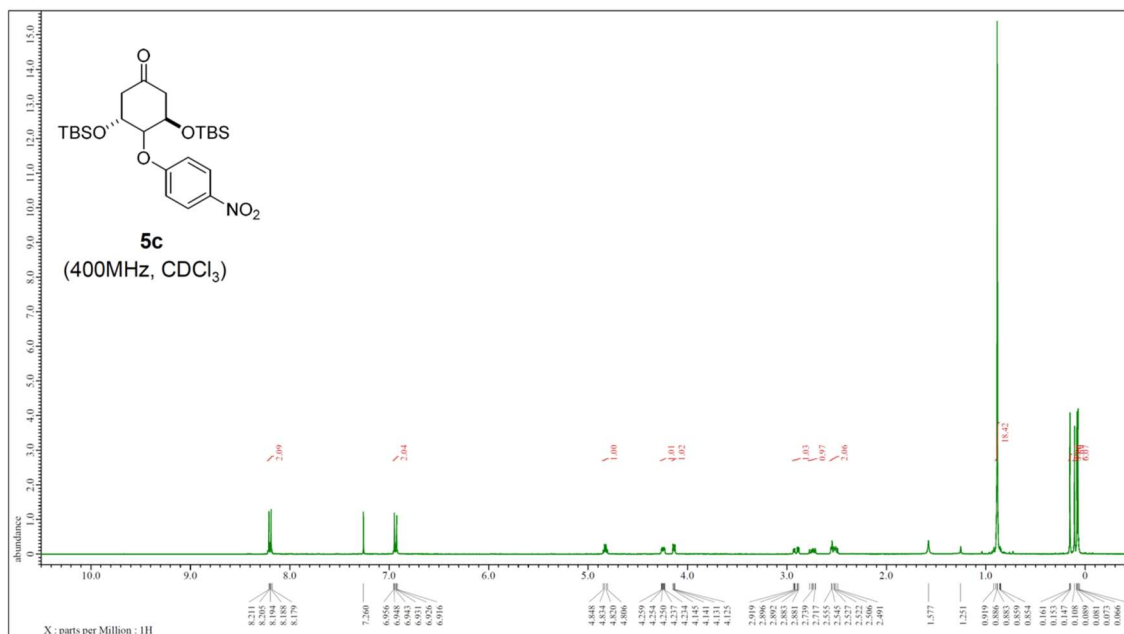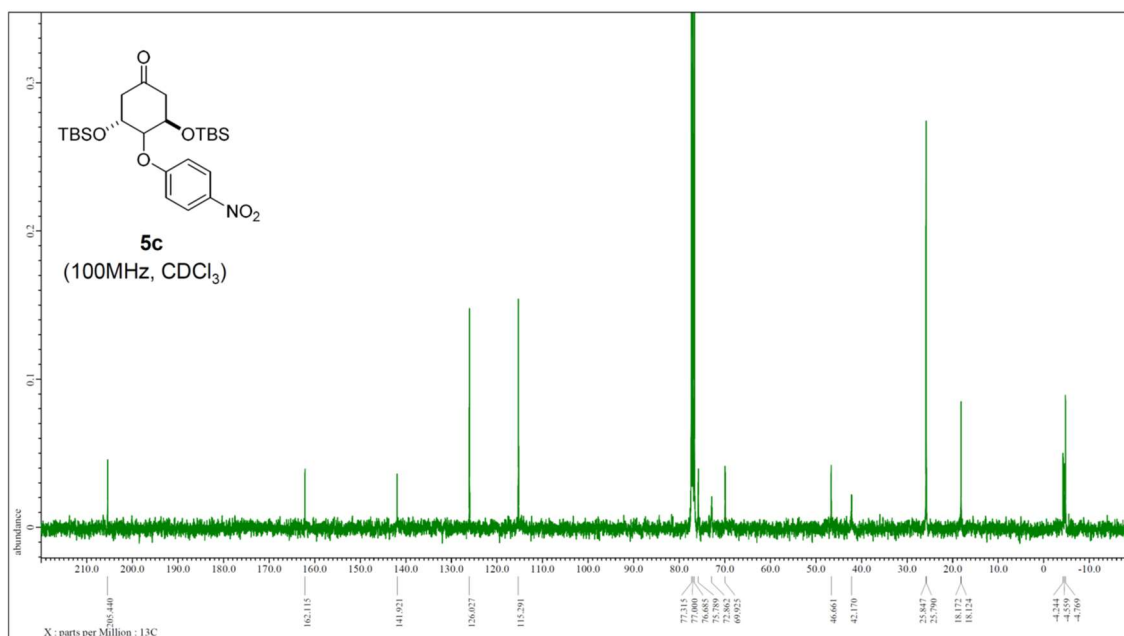

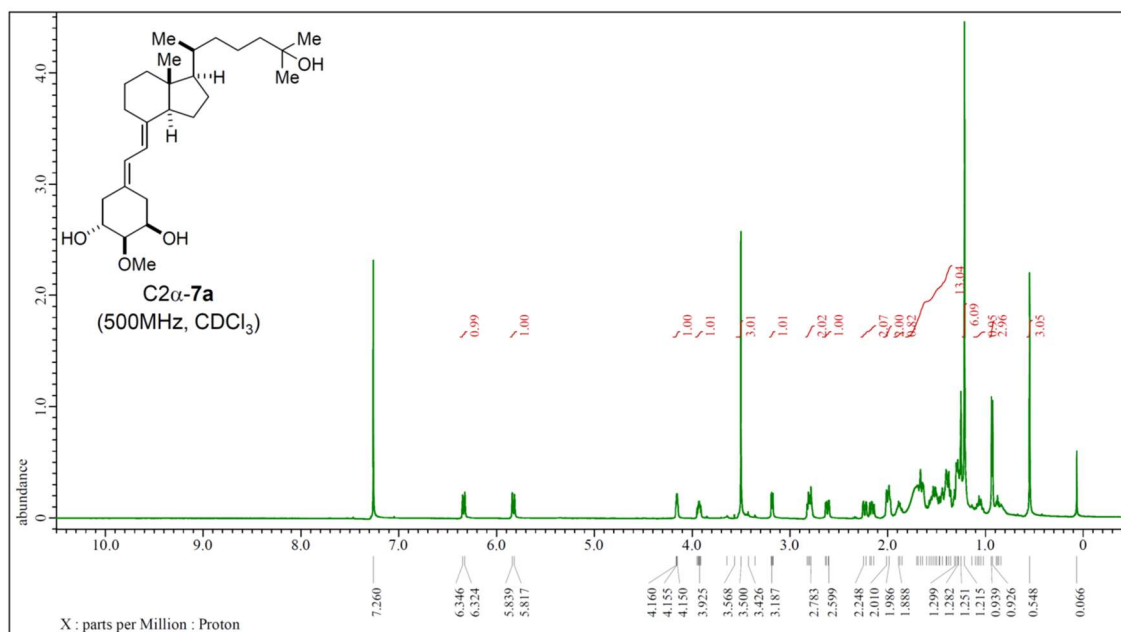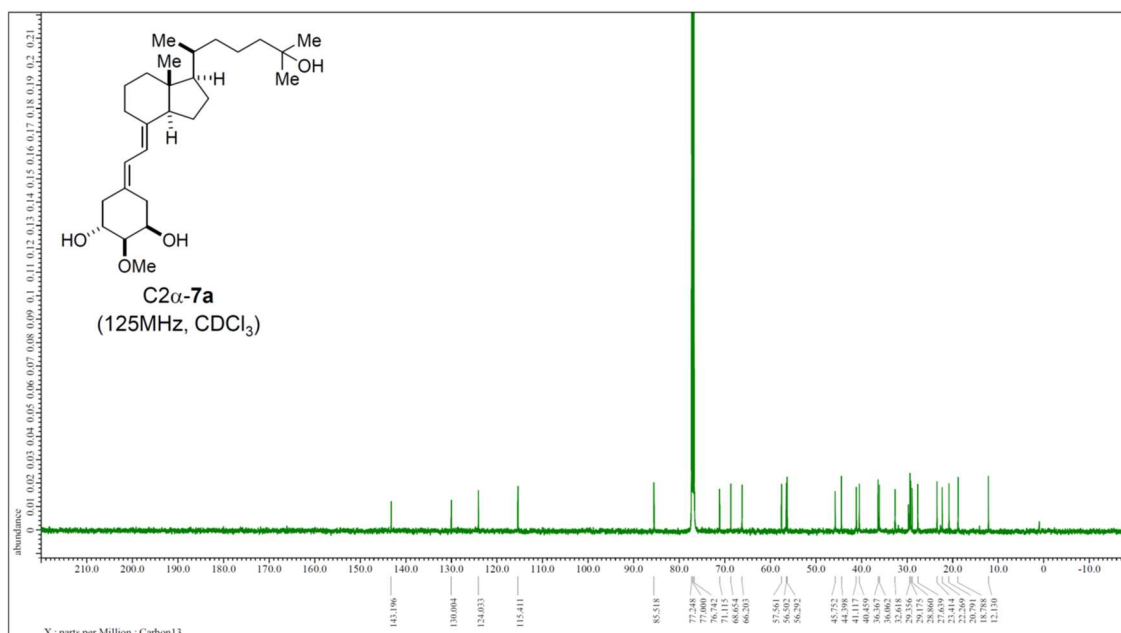

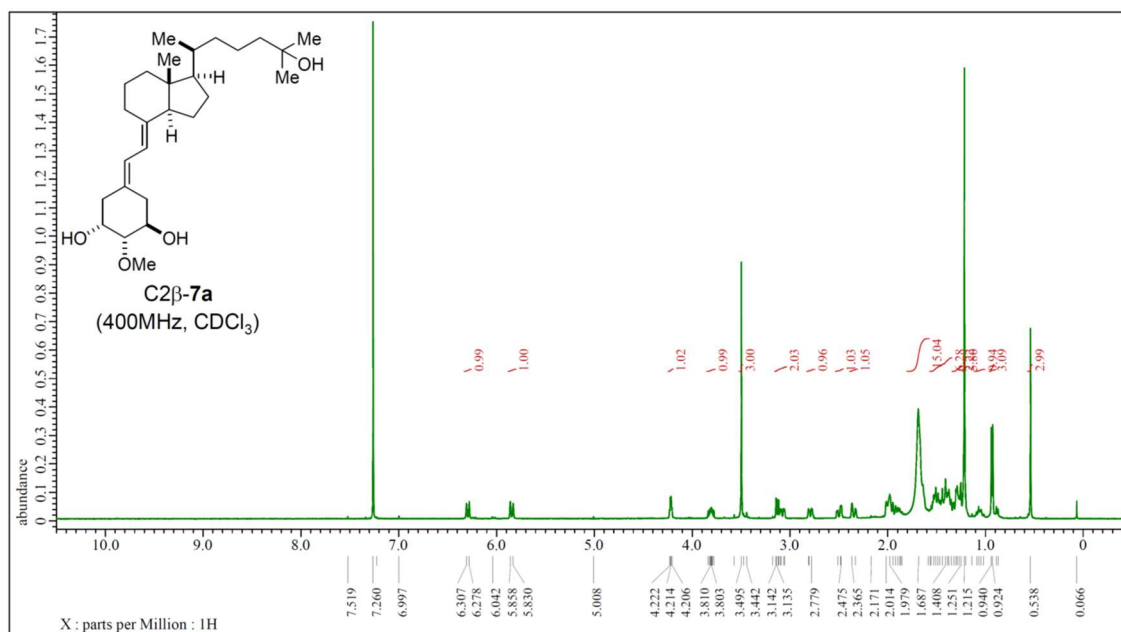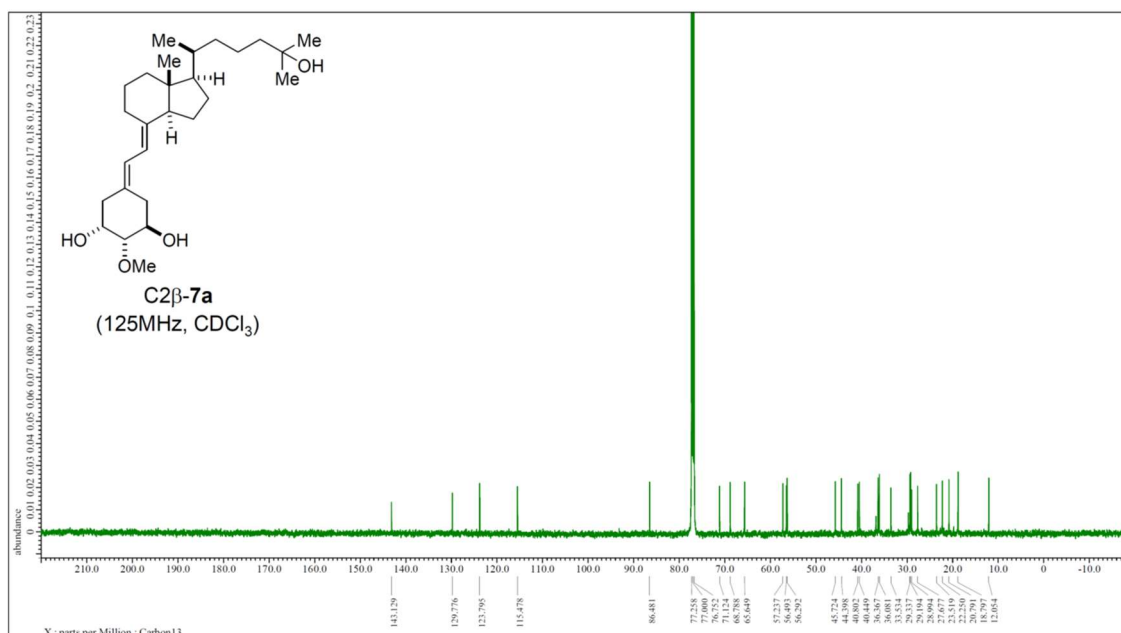







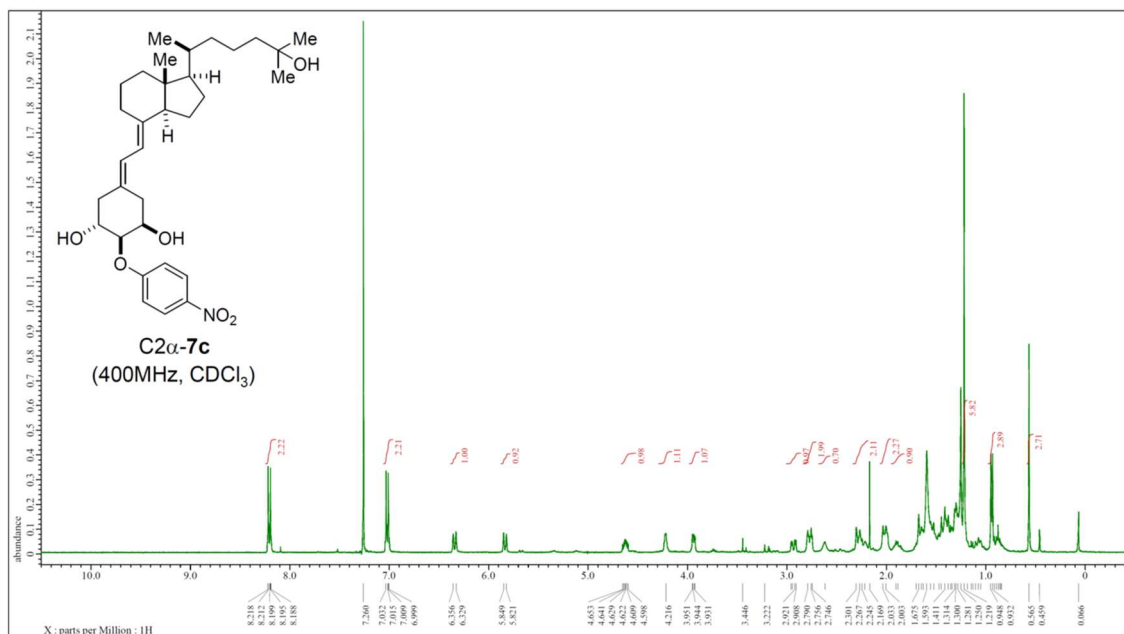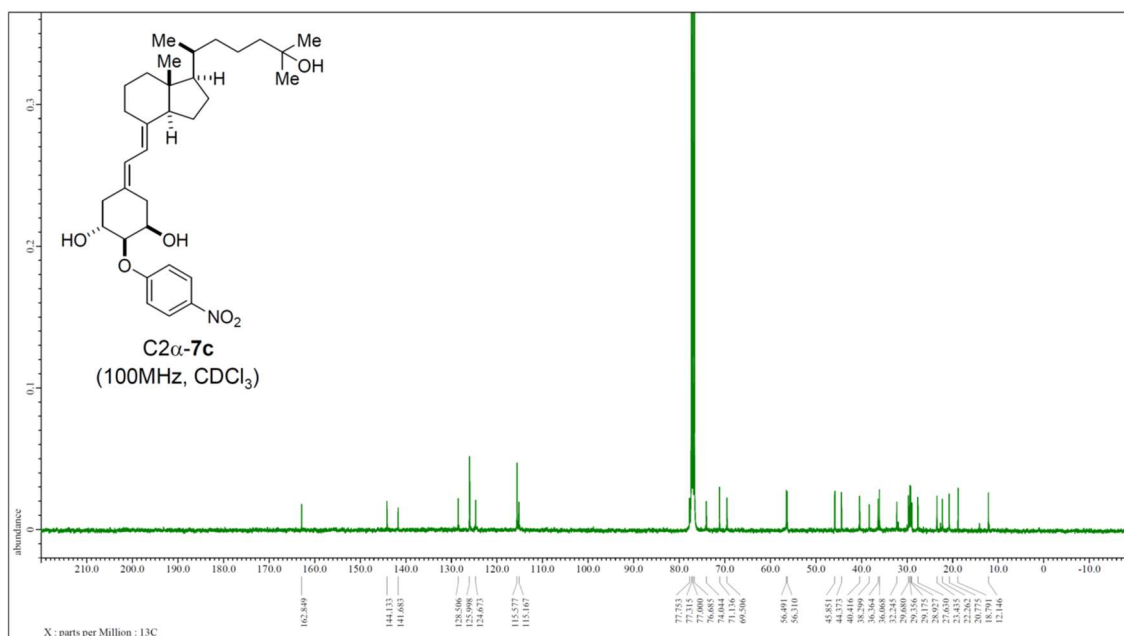

**Figure S1: Relative VDR binding affinity of 19-norvitamin D<sub>3</sub>**

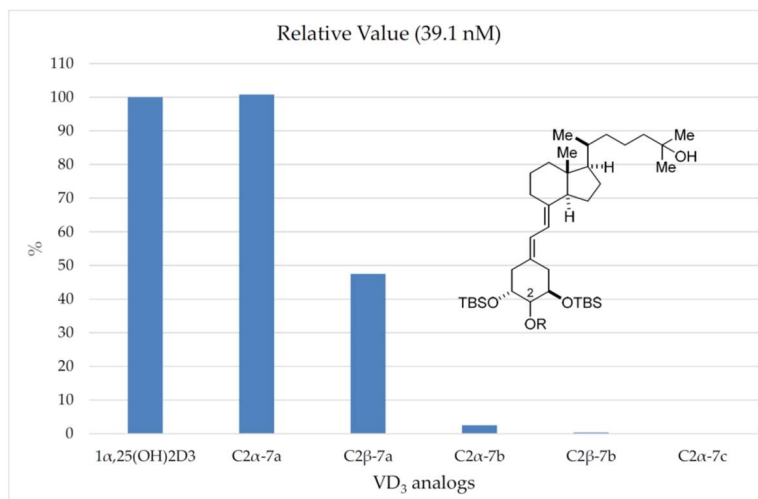

| Compound                         | ratio  |
|----------------------------------|--------|
| 1,25VD <sub>3</sub>              | 100    |
| C2α-7a (R=Me)                    | 100.76 |
| C2β-7a (R=Me)                    | 47.48  |
| C2α-7b (R=Bn)                    | 2.51   |
| C2β-7b (R=Bn)                    | 0.36   |
| C2α-7c (R=Ph-4-NO <sub>2</sub> ) | 0.00   |

**Figure S2: Charts of HL-60 cell differentiation activity of 19-norvitamin D<sub>3</sub>**

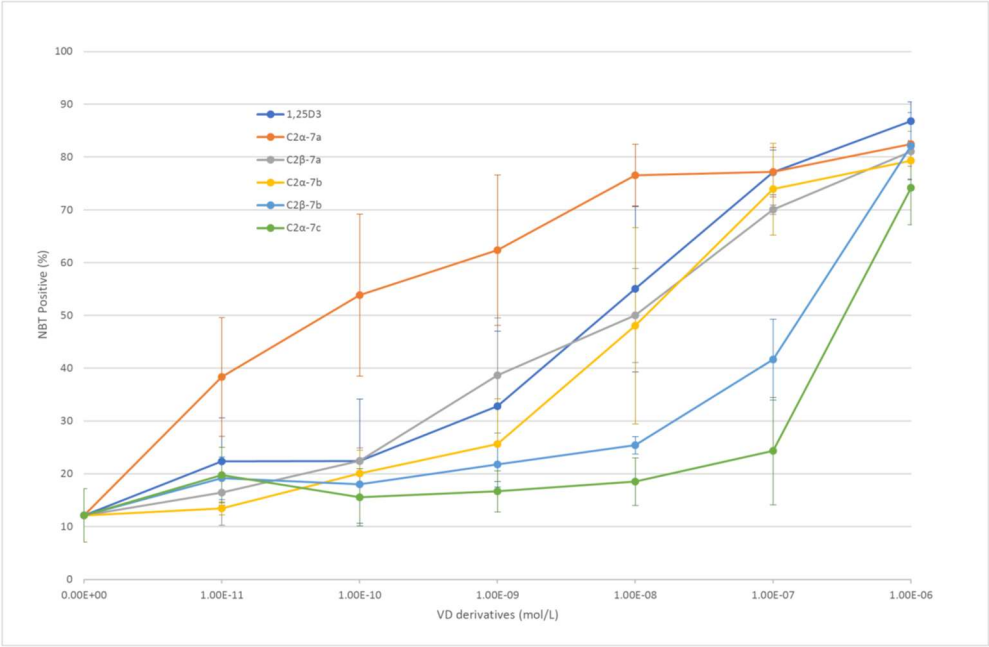

Supplement: s1 [file s1]
